# Supplementary material
Source: PubMed Central journal article supplement (PMC3533558)
Supplement: JCI65053sd.pdf [file JCI65053sd.pdf]

# Supplementary Data

Supplementary Figures and Figure Legends

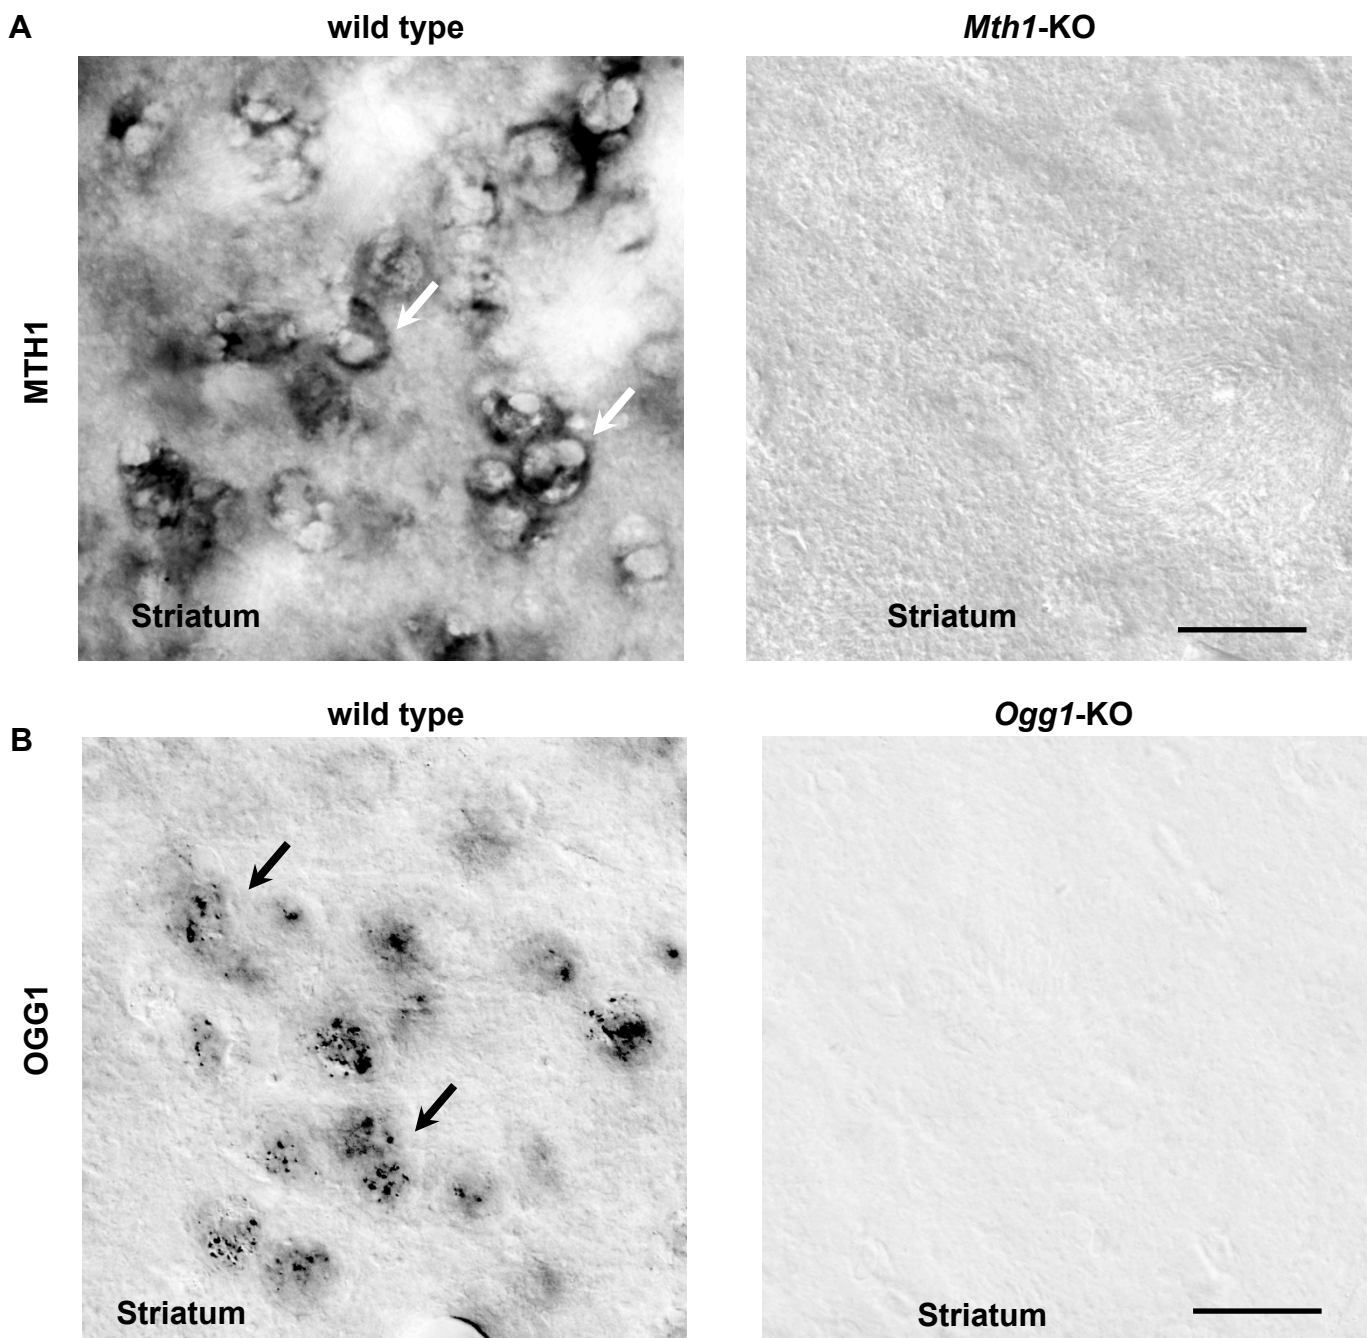

**Supplemental Figure 1. Immunohistochemical detection of MTH1 and OGG1 in the mouse striatum.**

(A) MTH1 expression was examined using the NB-109 antibody, which reacts with human MTH1; the human protein has 91% sequence identity with mouse and rat proteins. MTH1 was preferentially localized cytoplasm, but no signal was detected in *Mth1*-KO mice. Arrows, MTH1 immunoreactive signals. (B) OGG1 expression was examined using anti-OGG1 antibody. In wild-type striatum, OGG1 was detected in nucleus and cytoplasm, but no signal was detected in *Ogg1*-KO mice. Arrows, OGG1 immunoreactive signals. Bar, 20  $\mu$ m. Dark blue signals represent immunoreactivity. (A) (B) The images are visualized by differential interference contrast microscopy.

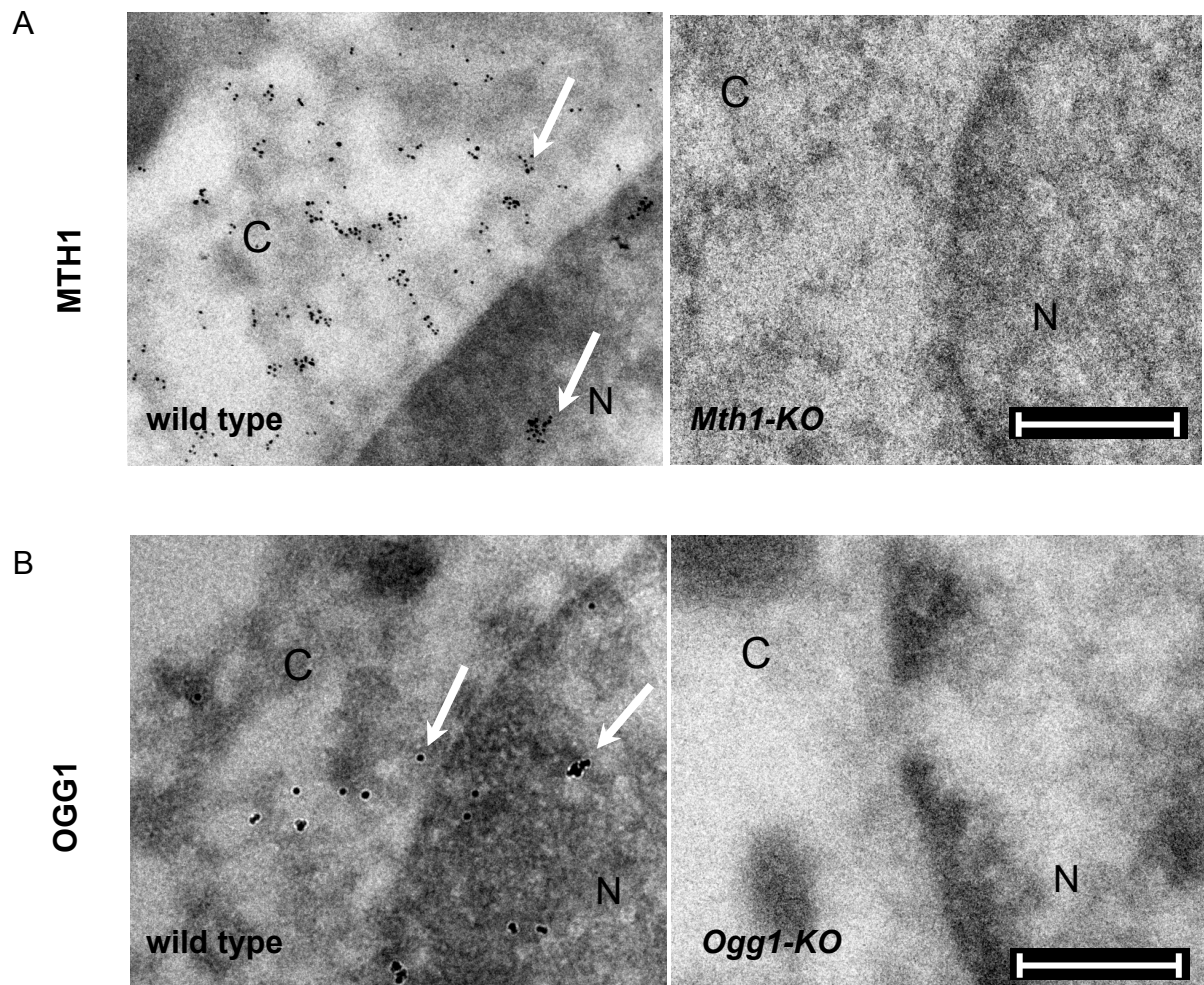

**Supplemental Figure 2. Detection of MTH1 and OGG1 in the mouse striatum by immunoelectron microscopy.**

(A) MTH1 expression was examined using the NB-109 antibody, MTH1 was preferentially localized in cytoplasm and some in nucleus, but no signal was detected in *Mth1-KO* striatum. Arrows, MTH1 immunoreactive signals. Bar, 500 nm. C, cytoplasm; N, nucleus. (B) OGG1 expression was examined using anti-Ogg1 antibody. In wild-type striatum, OGG1 was detected in nucleus, cytoplasm, but no signal was detected in *Ogg1-KO* striatum. Arrows, OGG1 immunoreactive signals. C, cytoplasm; N, nucleus. Bar, 500 nm.

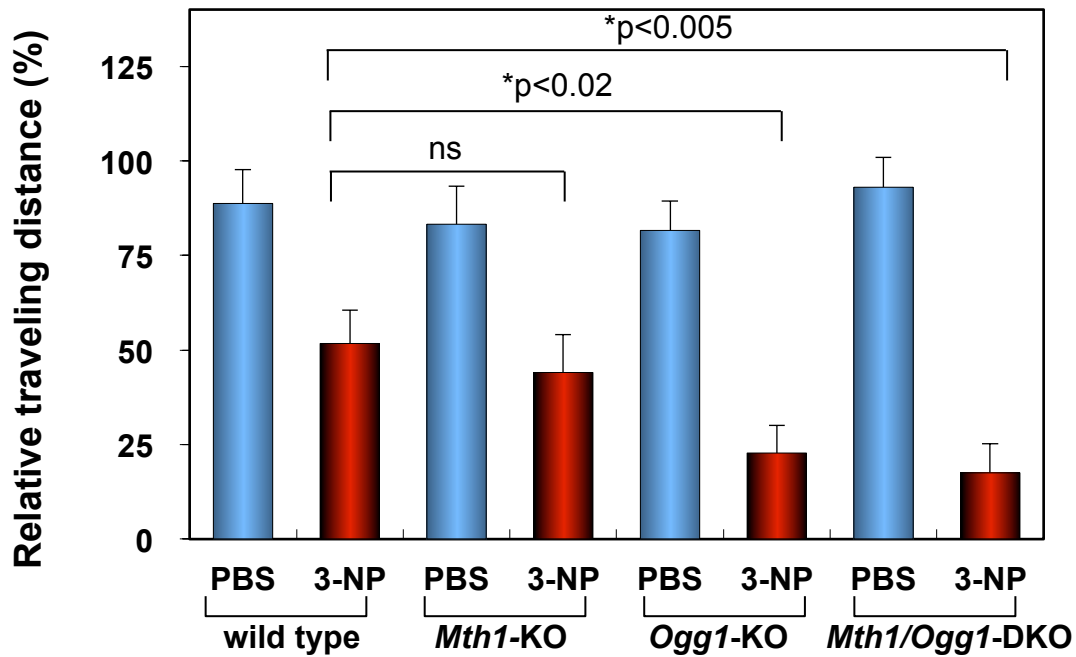

**Supplemental Figure 3. Behavioral assessments of mice by open field after exposure to 3-nitropropionic acid in various mouse strains**

Motor impairments in various mouse strains assessed by open field test after exposure to 3-nitropropionic acid (3-NP, 120 mg/kg) for one week. Wild-type (N=5 for PBS, N=5 for 3-NP), *Mth1*-KO (N=4 for PBS, N=4 for 3-NP), *Ogg1*-KO (N=5 for PBS, N=7 for 3-NP), and *Mth1/Ogg1*-DKO (N=5 for PBS, N=5 for 3-NP) were tested. Compared to wild-type mice exposed to 3-NP, *Ogg1*-KO 3-NP ( $p<0.02$ ), *Mth1/Ogg1*-DKO 3-NP ( $p<0.005$ ) (Student's *t*-test), ns, not significant. Relative traveling distance (%) indicates the traveling distance obtained on the 7<sup>th</sup> day after implantation of an osmotic mini-pump as a percentage of that obtained on the day before the implantation. Data are least squares means (LSMeans)  $\pm$  SE.

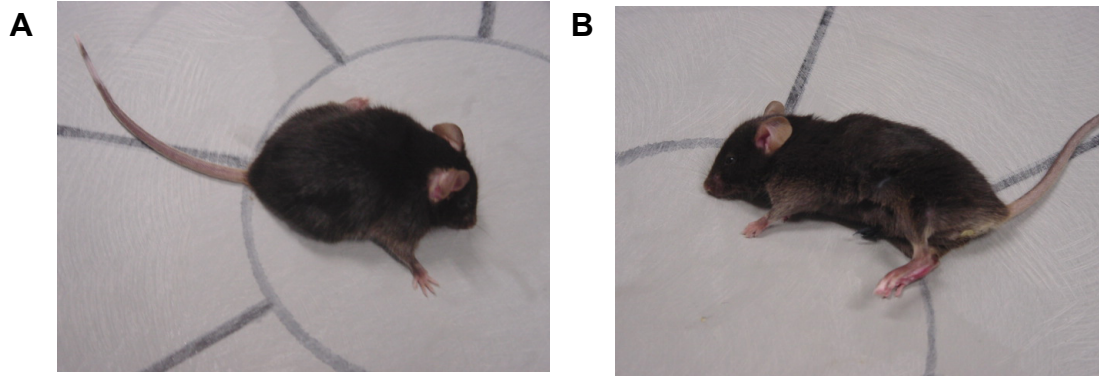

C

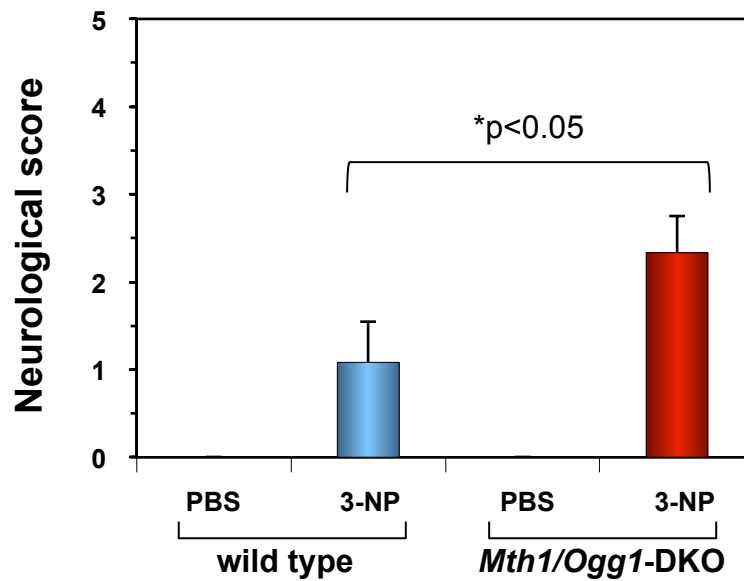

**Supplemental Figure 4. Motor impairment observed on the 7<sup>th</sup> day of chronic exposure to 3-NP**

Wild-type mice (N=10 for PBS, N=12 for 3-NP) and *Mth1/Ogg1*-DKO mice (N=11 for PBS, N=12 for 3-NP) were monitored for 10 min on the 7<sup>th</sup> day of exposure to 3-NP (120 mg/kg). Neurological score was defined as follows: (score=0, normal behavior; 1, general slowness of displacement resulting from mild hindlimb impairment; 2, incoordination and marked gait abnormality; 3, hindlimb paralysis; 4, incapacity to move resulting from forelimb and hindlimb impairment shown in A; 5, recumbency shown in B (Guyot MC et al., 1997). C, *Mth1/Ogg1*-DKO mice exhibited significantly higher neurological scores compared to wild type ( $p < 0.05$ , Mann-Whitney U-test). Data are shown with means  $\pm$  SE.

A

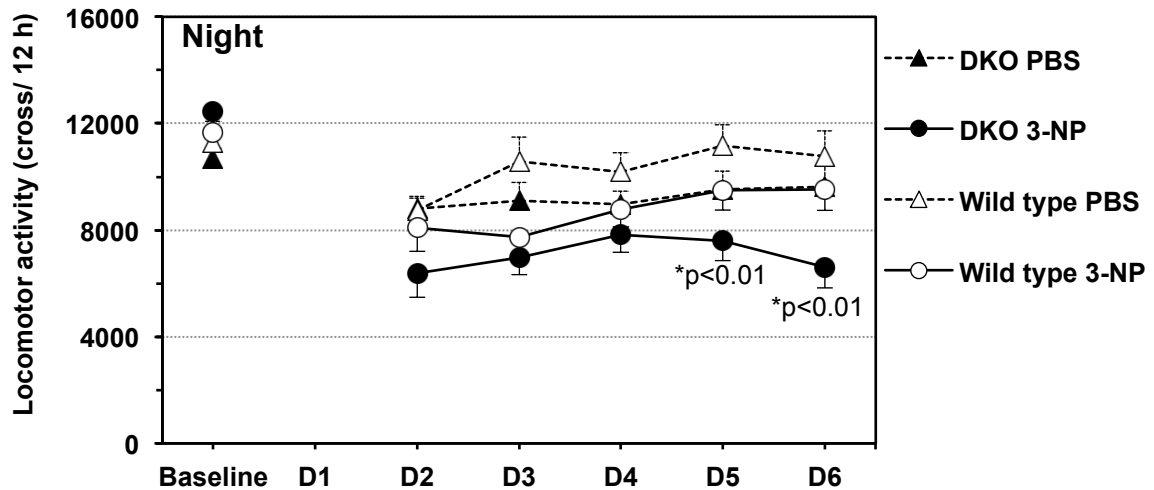

B

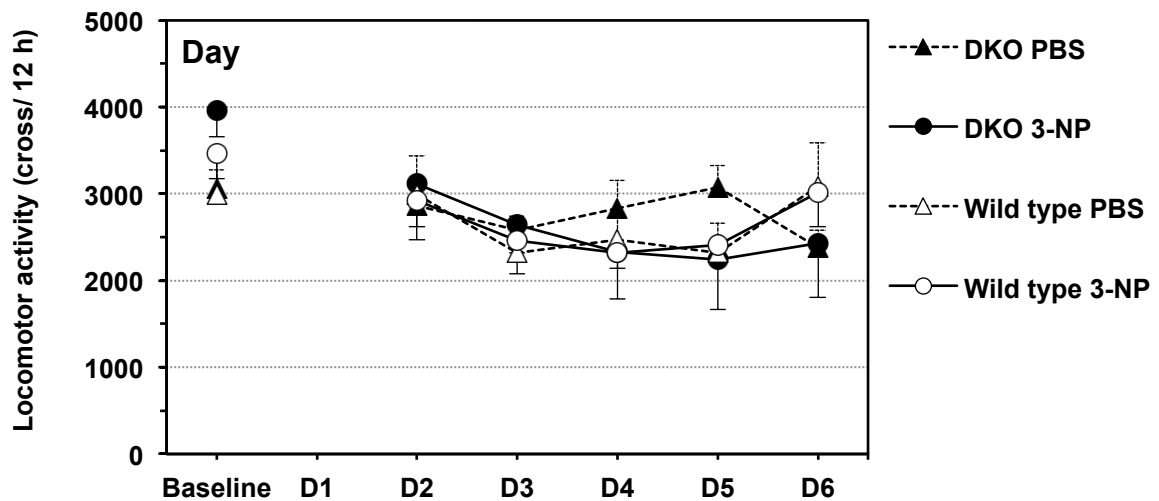

**Supplemental Figure 5. Impairment in spontaneous locomotor activity after exposure to 3-NP.**

(A) Night-phase locomotor activity observed in the home cage. (B) Day-phase locomotor activity observed in the home cage. Wild-type (N=6 for PBS, N=9 for 3-NP) and *Mth1/Ogg1*-DKO mice (N=6 for PBS, N=8 for 3-NP) were examined. In comparison to wild-type mice, the DKO mice exhibited greater decrease in night-phase locomotor activity on the day 5 (D5) and day 6 (D6) after exposed to 3-NP, however, there was no a significant difference on day-phase locomotor activity. Data are shown with mean  $\pm$  SE. \*p, Student's t test (DKO 3-NP vs Wild type 3-NP).

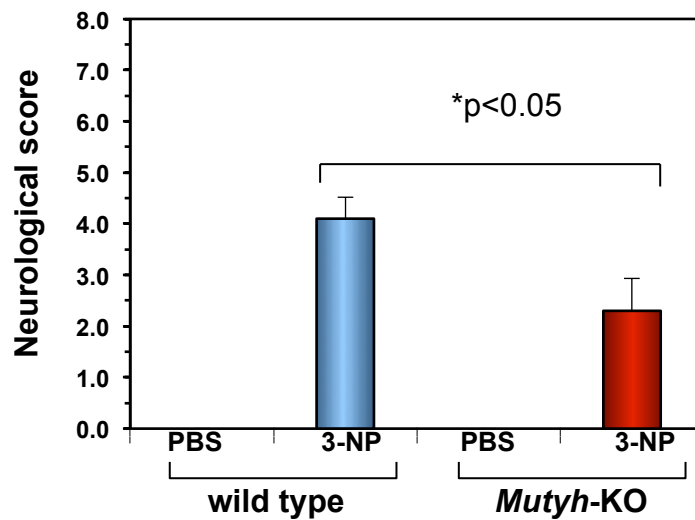

**Supplemental Figure 6. Motor impairment in wild-type and *Mutyh*-KO mice on the 7<sup>th</sup> day of exposure to higher dose of 3-NP .**

Wild-type mice (N=6 for PBS, N=10 for 3-NP) and *Mutyh*-KO mice (N=6 for PBS, N=10 for 3-NP) were monitored for 10 min on the 7<sup>th</sup> day of exposure to 3-NP (150 mg/kg). Wild-type mice exhibited more severe score compared to *Mutyh*-KO ( $p < 0.05$ , Mann-Whitney U-test). Data are shown with mean  $\pm$  SE.

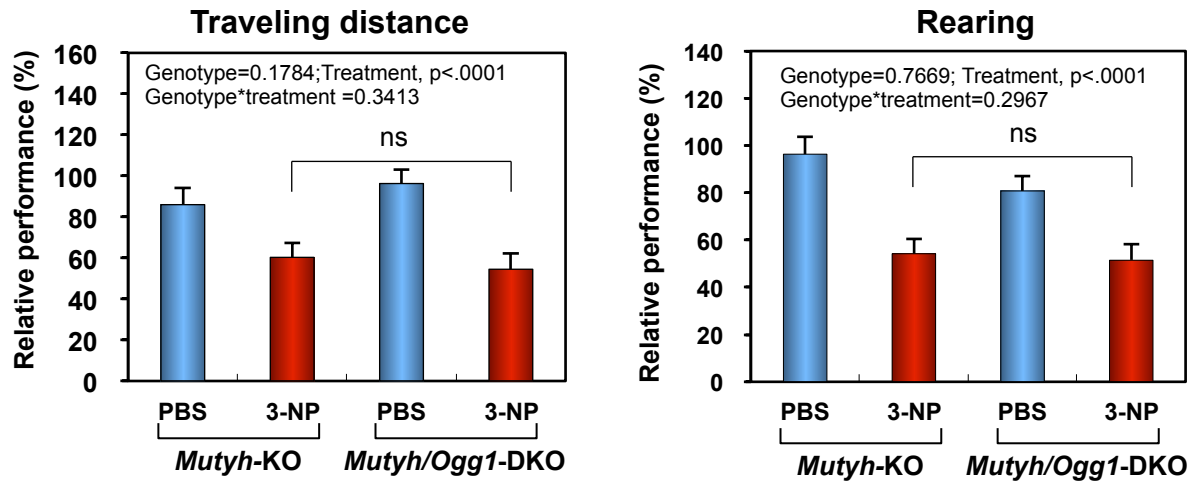

**Supplemental Figure 7. Behavioral assessments of mice by open field test after exposure to 3-nitropropionic acid between *Mutyh*-KO and *Ogg1/Mutyh*-DKO.**

*Mutyh*-KO (N=7 for PBS, N=5 for 3-NP) and *Ogg1/Mutyh*-DKO (N=6 for PBS, N=7 for 3-NP) were subjected to open field test on the 7<sup>th</sup> day of exposure to 3-NP (120 mg/kg). There was no a significant effect of genotype, ns, not significant. Relative performance (%) indicates the traveling distance or number of rearing obtained on the 7<sup>th</sup> day after implantation of an osmotic mini-pump as a percentage of those obtained on the day before the implantation. Data are least squares means (LSMeans)  $\pm$  SE.



## Supplementary materials:

**Supplemental Movie 1.** A control *Mth1/Ogg1*-DKO mouse that received PBS infusions for a week exhibited normal spontaneous motor activity in open field.

**Supplemental Movie 2.** An *Mth1/Ogg1*-DKO mouse that received 3-NP infusions for 1 week (120 mg/kg/day) exhibited a dramatic decrease in the amount of spontaneous motor activity in the open field.
